# Supplementary material for: Debulking Hepatectomy for Colorectal Liver Metastasis Conveys Survival Benefit
Source: MDPI journal article supplement (doi:10.3390/cancers16091730), 2024-04-29
Supplement: s1 [file s1]

**Supplementary Table S1: Management of postoperative complications**

| Complication                                           | Clavien-Dindo Classification | Management                                               |
|--------------------------------------------------------|------------------------------|----------------------------------------------------------|
| Atrial fibrillation                                    | II                           | Cardiology evaluation<br>Beta-blocker<br>Anticoagulation |
| ISGLS PHLF Grade A:<br>Elevation in bilirubin on POD 5 | 0                            | Observation                                              |
| Infected biloma, abscess                               | IIIa                         | Antibiotics<br>IR drainage                               |
| Below knee DVT                                         | II                           | Therapeutic anticoagulation                              |
| Ileus                                                  | I                            | Bowel rest<br>Electrolyte replacement                    |
| Prolonged Ileus                                        | II                           | Bowel rest<br>Electrolyte replacement                    |
| Postoperative hypotension                              | II                           | Transient levophed infusion                              |
| ISGLS PHLF Grade B:<br>Development of ascites          | 0                            | Temporary diuretics                                      |
| Atrial fibrillation                                    | II                           | Cardiology evaluation<br>Beta-blocker<br>Anticoagulation |
| Candida, groin                                         | II                           | Topical anti-fungal cream                                |
| PVT                                                    | II                           | Therapeutic anticoagulation                              |
| Hypovolemia, syncope                                   | II                           | Fluid resuscitation<br>Telemetry                         |
| MCA stroke                                             | IVb                          | ICU<br>Endotracheal intubation<br>Dialysis               |
| PE                                                     |                              | Therapeutic anticoagulation                              |
| Pelvic abscess                                         | IIIa                         | Antibiotics<br>IR drainage                               |
| ISGLS PHLF Grade A:<br>Elevation in bilirubin on POD 5 | 0                            | Observation                                              |

ISGLS, international study group of liver surgery; PHLF, post-hepatectomy liver failure; DVT, deep vein thrombosis; PVT, portal vein thrombosis; MCA, middle cerebral artery; PE, pulmonary embolism; IR, interventional radiology; ICU, intensive care unit
